# Supplementary material for: Identification of exercise‐regulated genes in mice exposed to cigarette smoke
Source: PubMed Central journal article supplement (PMC9630761; doi:10.14814/phy2.15505), 2022-11-02

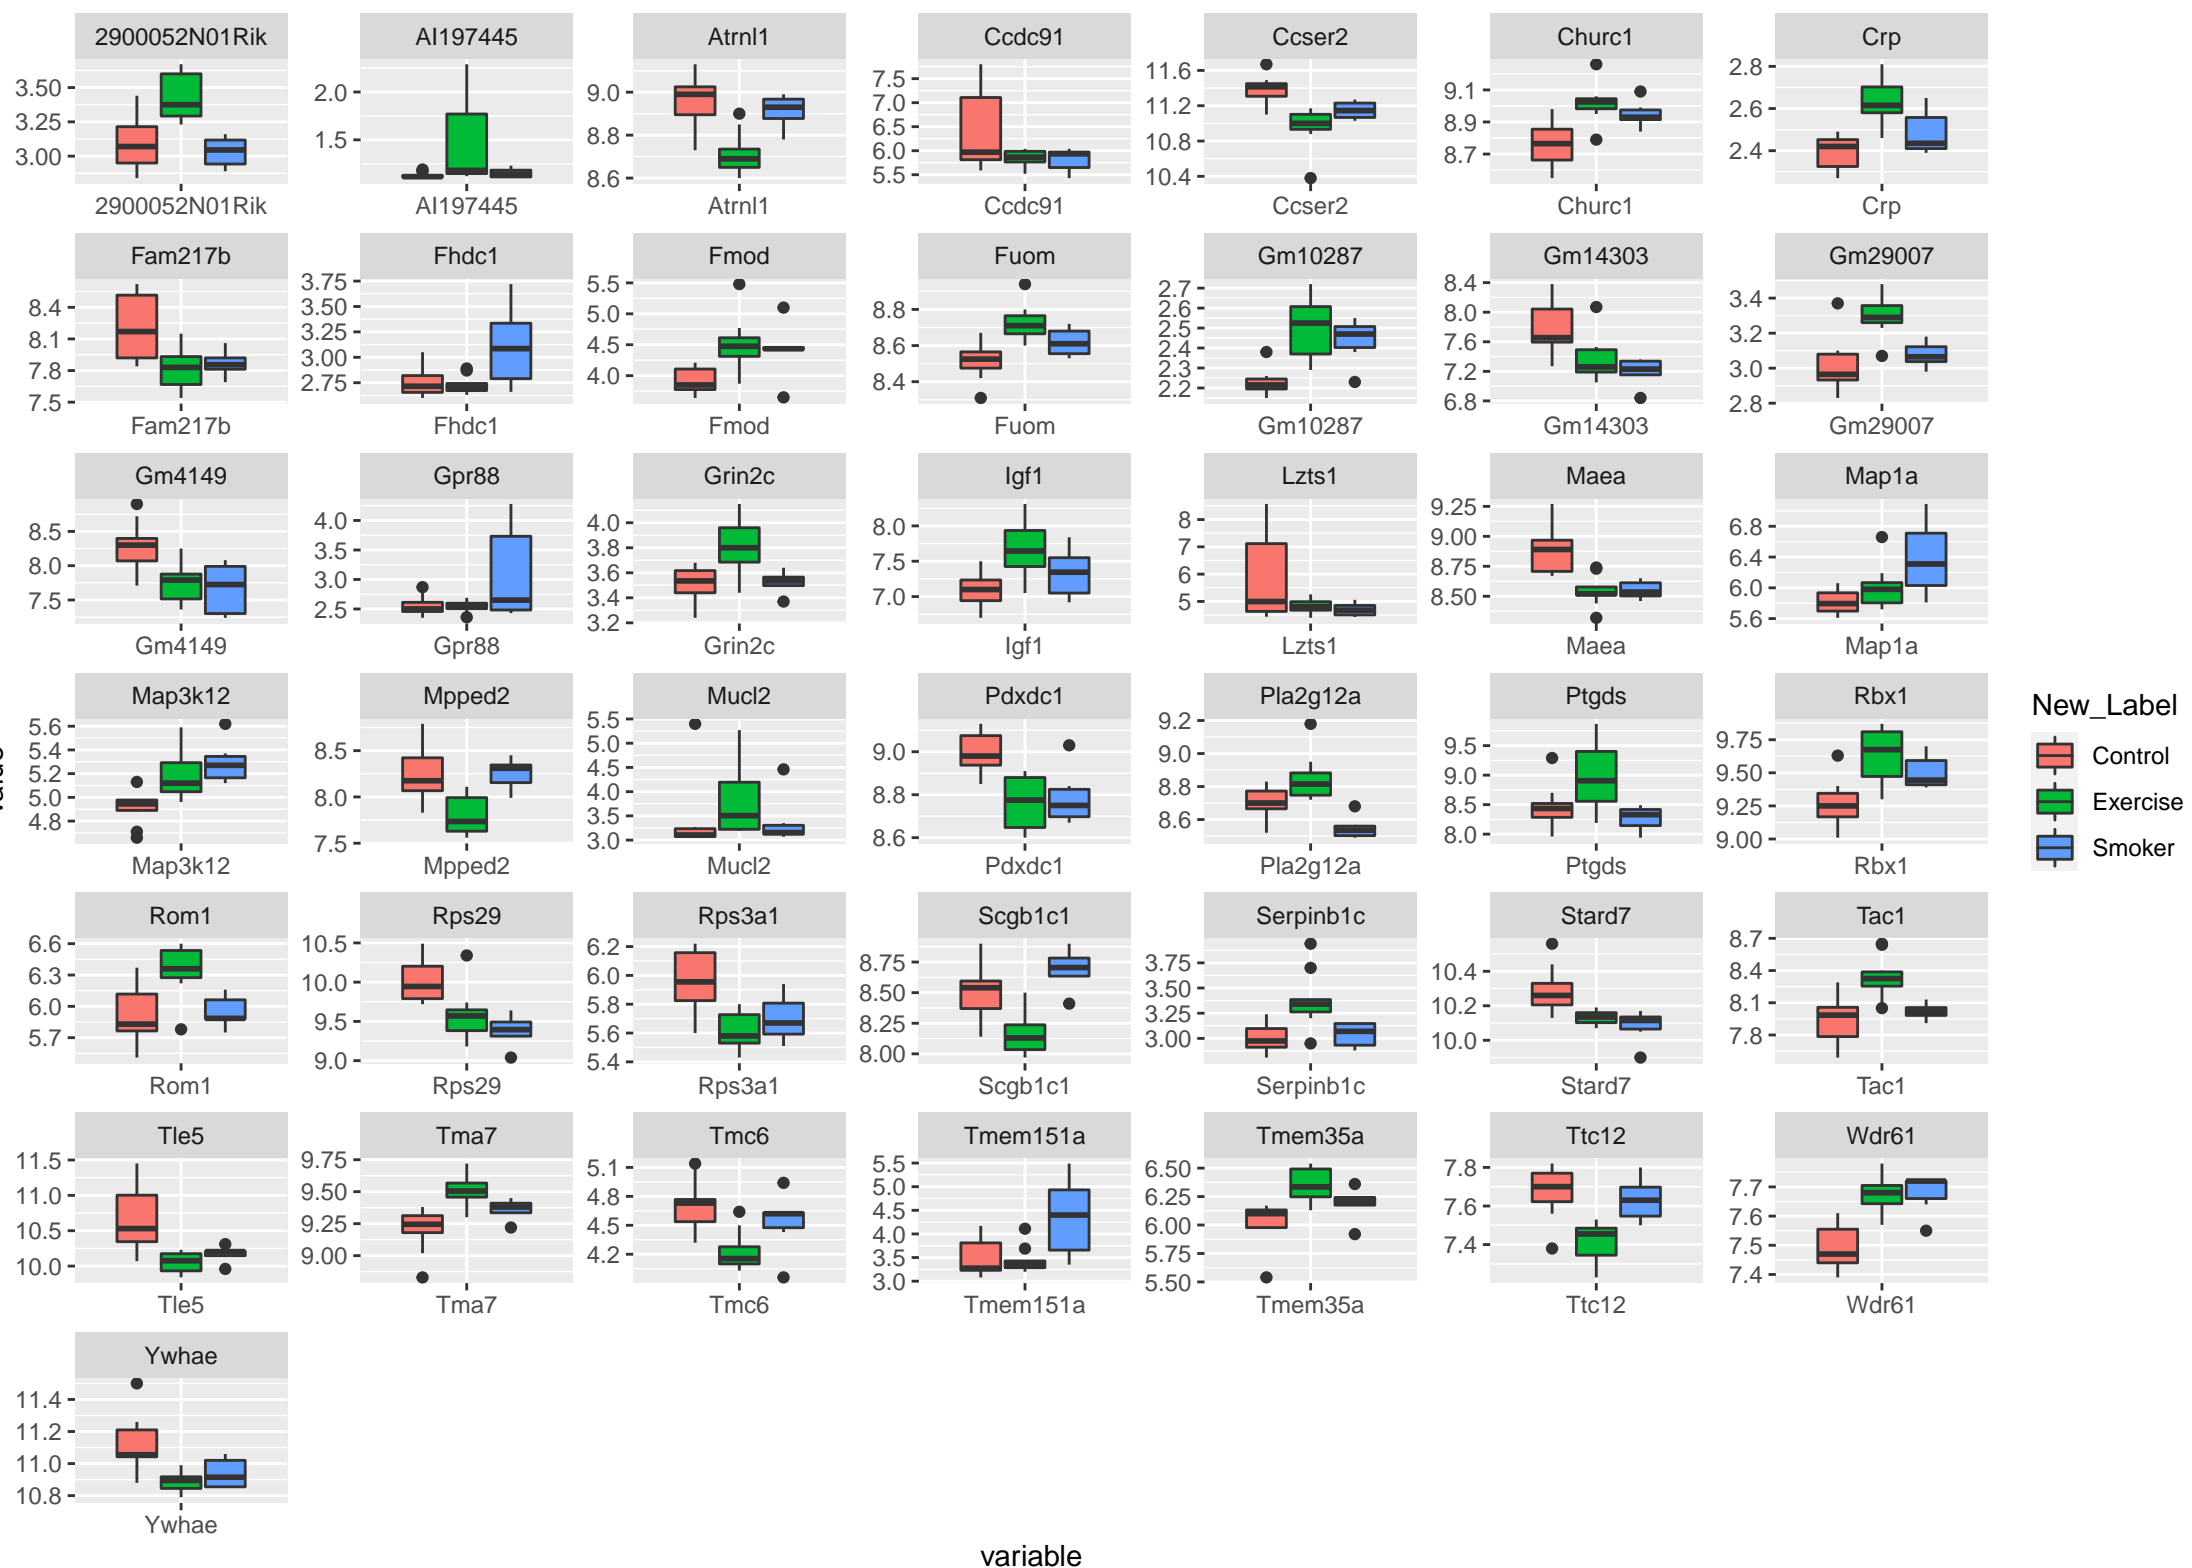

Supplement: PHY2-10-e15505-s004.pdf [file PHY2-10-e15505-s004.pdf]
